# Supplementary material for: An unprecedented nanocage-like and heterometallic [MoIV3O4]-polyoxomolybdate hybrid
Source: Royal Society of Chemistry journal article supplement (doi:10.1039/c7dt04309k), 2018-01-01
Supplement: c7dt04309k1.pdf [file c7dt04309k1.pdf]

## Electronic Supplementary Information

### Unprecedented Fullercage-like and Heterometallic [Mo<sup>IV</sup><sub>3</sub>O<sub>4</sub>]- Polyoxomolybdate Hybrid

Xian Xu, Benlong Luo, Lulu Wang, and Li Xu \*

State Key Laboratory of Structural Chemistry, Fujian Institute of Research on the Structure of Matter, Chinese Academy of Science, Fuzhou, Fujian, 350002, China

**E-mail:** xli@fjirsm.ac.cn

#### Crystallographic Analysis

The intensity data were collected on a Rigaku Mercury CCD diffractometer for **1** and **2**, with graphite-monochromated Mo<sub>K $\alpha$</sub>  radiation ( $\lambda = 0.71073 \text{ \AA}$ ) at room temperature. All absorption corrections were performed by using the multi-scan program. The structure were solved by direct methods and refined by full-matrix least squares on  $F^2$  with the SHELXTL-97 program. CCDC-1575809 (**1**) and CCDC-1575810 (**2**) contain the supplementary crystallographic data for this paper, these data can be obtained free of charge from the Cambridge Crystallographic Data Centre via [www.ccdc.cam.ac.uk/data\\_request/cif](http://www.ccdc.cam.ac.uk/data_request/cif).

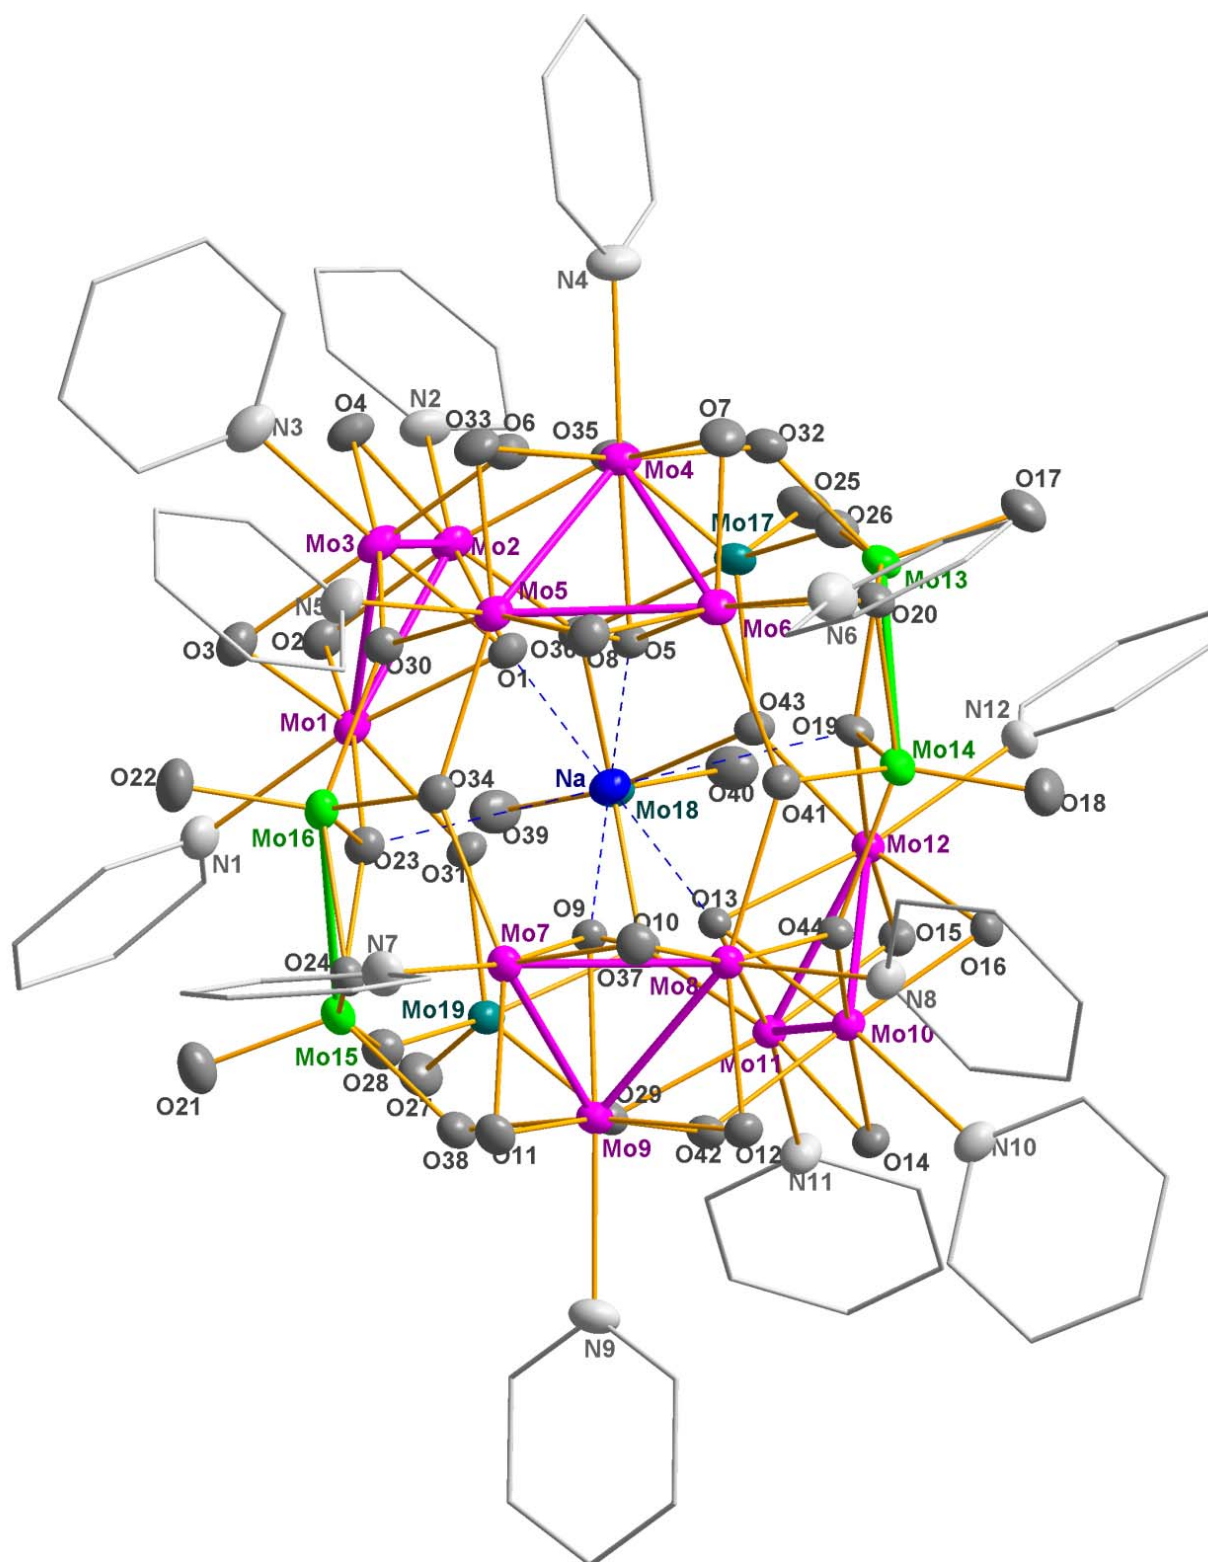

**Fig. S1** Structure of **1** with 50% probability thermal ellipsoids for non-carbon atoms ( $\text{Mo}^{4+}$ , pink,  $\text{Mo}^{\text{V}}$ , green,  $\text{Mo}^{\text{VI}}$ , black green).

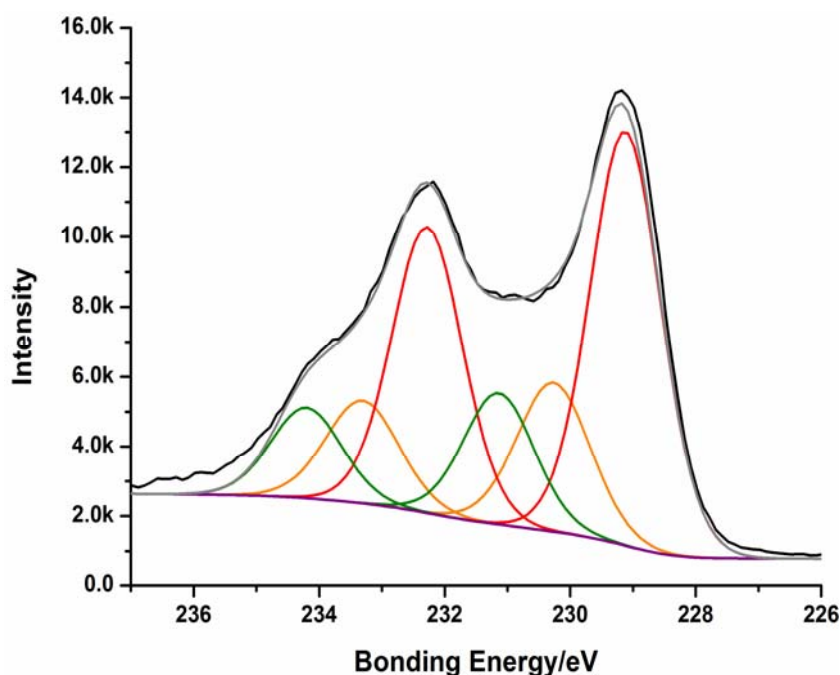

Binding energies of Mo 3d from the literature<sup>16-22</sup> and the binding energies of peaks used to assign species from the present measurements of **1**.

| Oxidation state                                     | Mo 3d <sub>5/2</sub> | Mo 3d <sub>3/2</sub> |
|-----------------------------------------------------|----------------------|----------------------|
| Mo <sup>IV</sup> - MoO <sub>2</sub>                 | 228.8-229.3          | 231.7-232.6          |
| Mo <sup>IV</sup> - <b>3</b>                         | 230.0                | 233.2                |
| Mo <sup>V</sup> - MoCl <sub>5</sub>                 | 230.9-231.1          | 234.3-235.4          |
| Mo <sup>VI</sup> - Na <sub>2</sub> MoO <sub>4</sub> | 231.9-232.3          | 235-235.4            |
| Mo <sup>VI</sup> - <b>3</b>                         | 231.9                | 235.05               |
| Mo <sup>IV</sup> - <b>1</b>                         | 229.12               | 232.28               |
| Mo <sup>V</sup> - <b>1</b>                          | 230.26               | 233.30               |
| Mo <sup>VI</sup> - <b>1</b>                         | 231.14               | 234.20               |

**Fig. S2** XPS of **1** shows an approximate 12:4:3 ratio of Mo<sup>IV</sup>:Mo<sup>V</sup>:Mo<sup>VI</sup> (the binding energies of all of the peaks are referenced to a C 1s value of 284.6 eV).

Reference

16. C. Shi, A.M. Zhu, X.F. Yang and C.T. Au, *Catal. Lett.* 2004, **97**, 9–16.
17. F. Werfel and E. Minni, *J. Phys. C: Solid State Phys.* 1983, **16**, 6094.
18. B. Brox and I. Olefjord, *Surf. Interface Anal.* 1988, **13**, 3.
19. C. R. Clayton and Y. C. Lu, *Surf. Interface Anal.* 1989, **14**, 66.
20. Y. C. Lu, C.R. Clayton, *Corros. Sci.* 1989, **29**, 927.
21. I. A. Okonkwo, J. Doff, A. Baron-Wiecheć, G. Jones, E. V. Koroleva, P. Skeldon and G. E. Thompson, *Thin Solid Films*, 2012, **520**, 6318–6327.
22. [http://srdata.nist.gov/xps/DataDefinition.aspx\(26/08/2009\)](http://srdata.nist.gov/xps/DataDefinition.aspx(26/08/2009)).

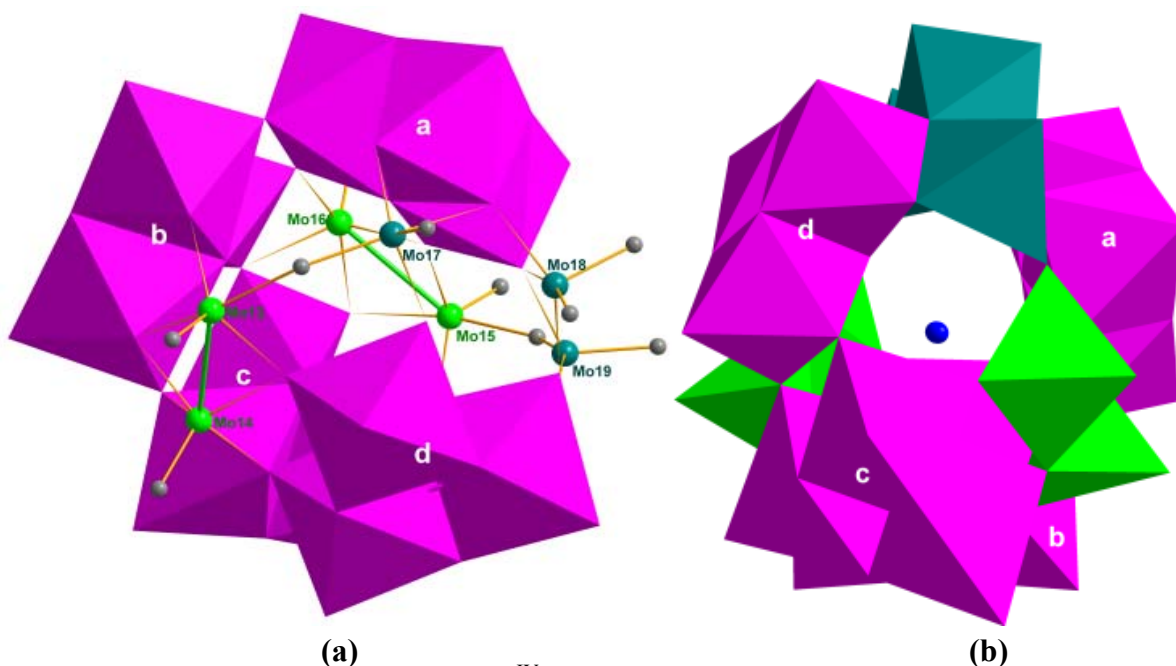

**Fig. S3** (a) Four 2-corner shared  $\text{Mo}^{\text{IV}}_3\text{O}_{13}$  sets (a→d pink polyhedra) linked together by two  $\text{Mo}_2$  dimmers (green) and three  $\text{Mo}^{\text{VI}}$  (black green) (b)  $\text{Na}^+$ -incorporated channel formed by the four  $\text{Mo}^{\text{IV}}_3\text{O}_{13}$  sets (a→d), four  $\text{Mo}^{\text{V}}$  and three  $\text{Mo}^{\text{VI}}$  mono-capped squares.

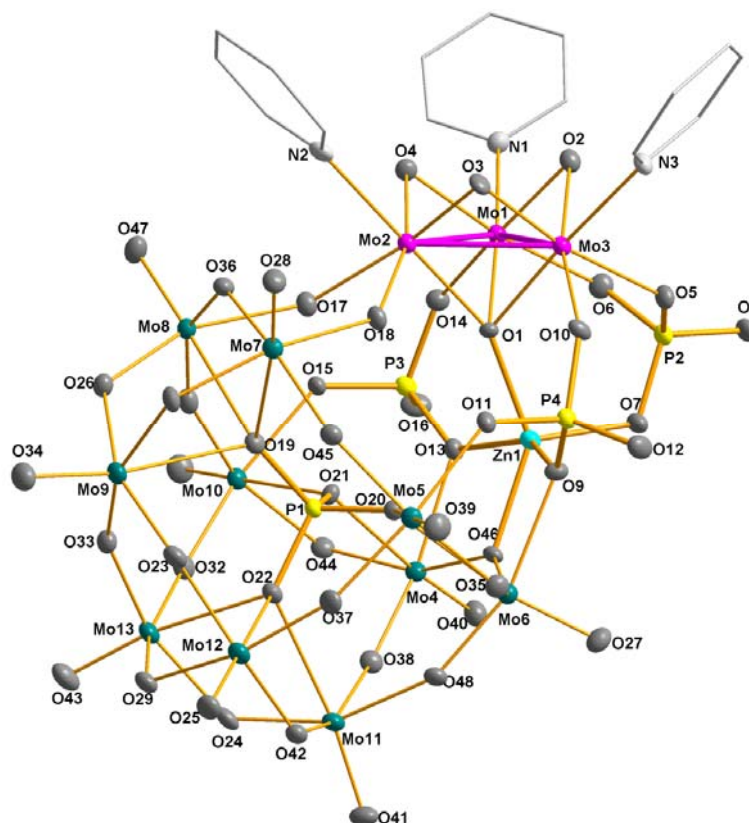

**Fig. S4** Structure of **2** with 30% probability thermal ellipsoids for non-carbon atoms ( $\text{Mo}^{4+}$ , pink;  $\text{Mo}^{\text{VI}}$ , black green;  $\text{P}^{5+}$ , yellow;  $\text{Zn}^{2+}$ , aqua)

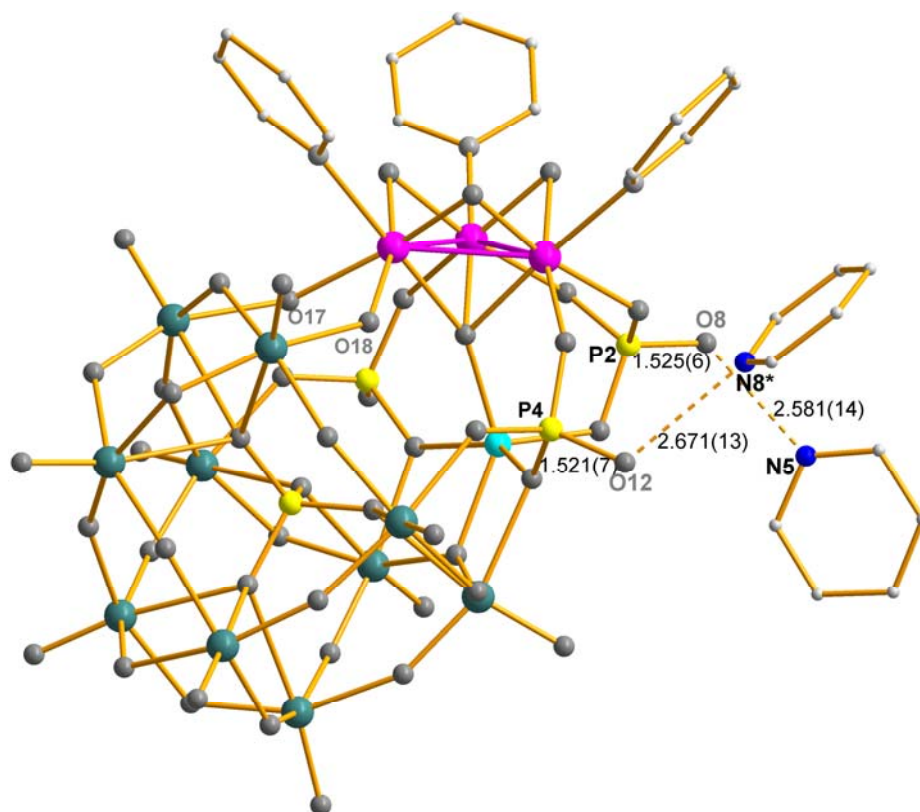

**Fig. S5** Hydrogen bonds between PO<sub>4</sub> and protonated pyridine [N8\* is at equivalent position (1/2+x, -1/2-y, 1/2+z)].

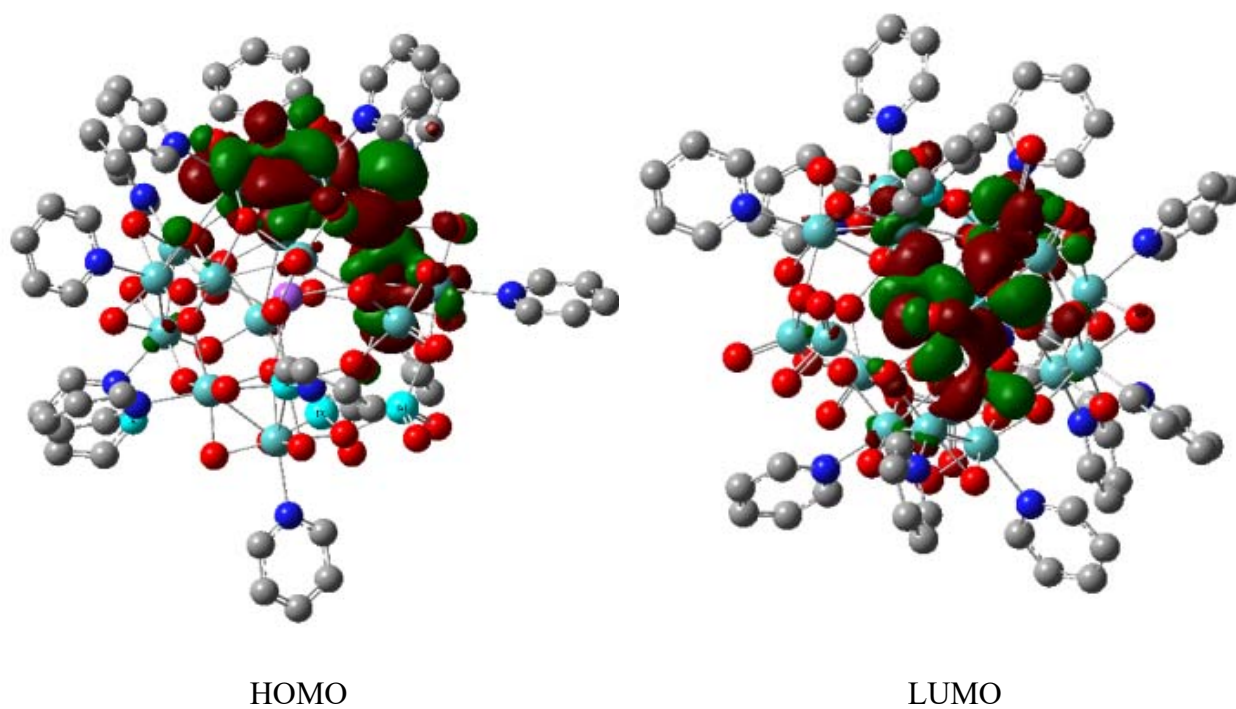

**Fig. S6** HOMO and LUMO of 1.

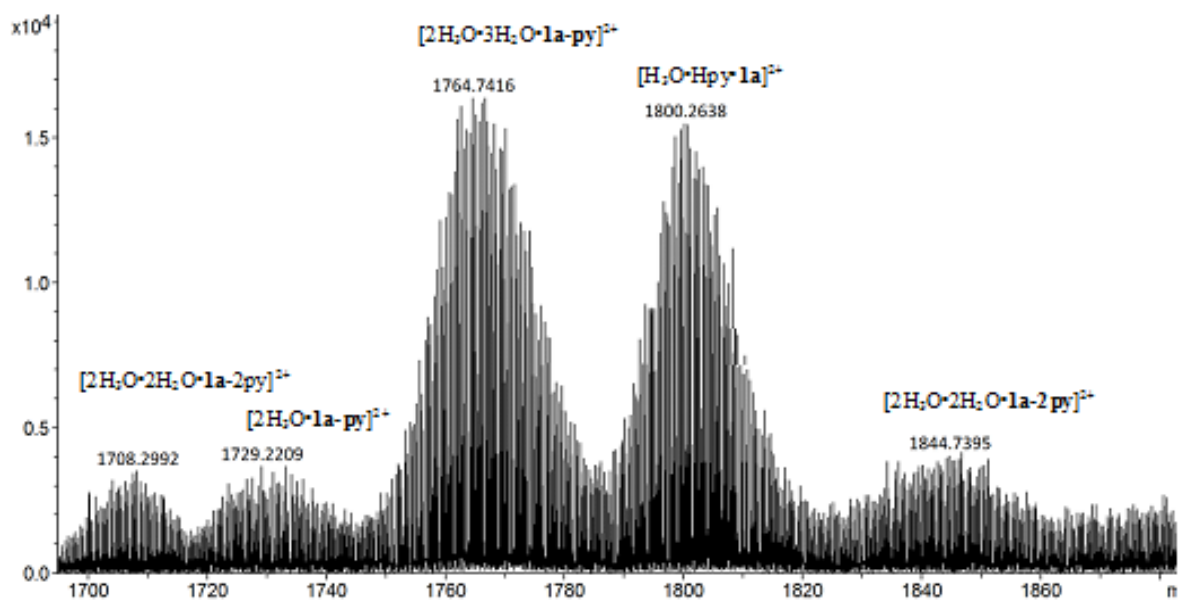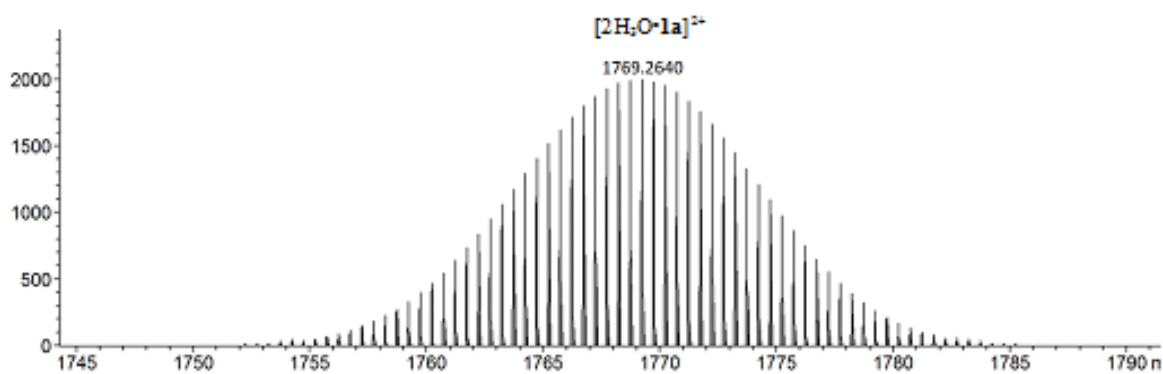

S7

**Fig. S7** Mass spectroscopy of  $\text{Na}[\text{Mo}^{\text{IV}}_{12}\text{Mo}^{\text{V}}_4\text{Mo}^{\text{VI}}_3\text{O}_{43}(\text{OH})\text{Py}_{12}] \cdot 11\text{H}_2\text{O}$  (**1a**·11H<sub>2</sub>O) in DMF solution.

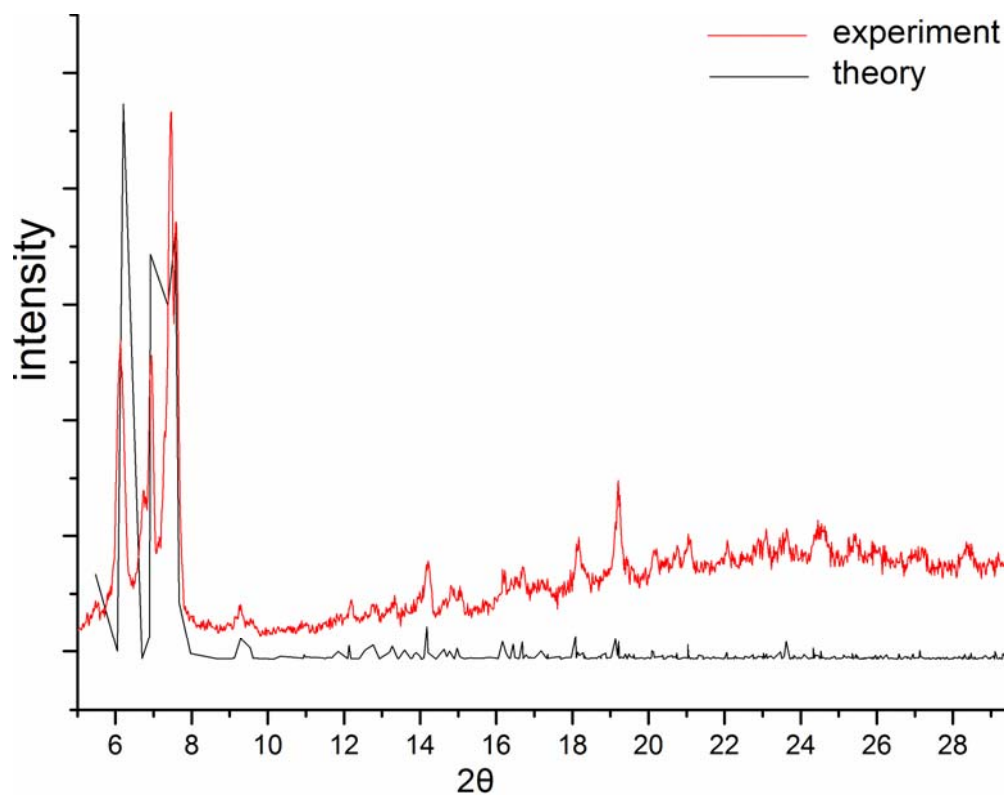

**Fig. S8** P-XRD of  $\text{Na}[\text{Mo}^{\text{IV}}_{12}\text{Mo}^{\text{V}}_4\text{Mo}^{\text{VI}}_3\text{O}_{43}(\text{OH})\text{Py}_{12}] \cdot 11\text{H}_2\text{O}$  (**1a**·11H<sub>2</sub>O)

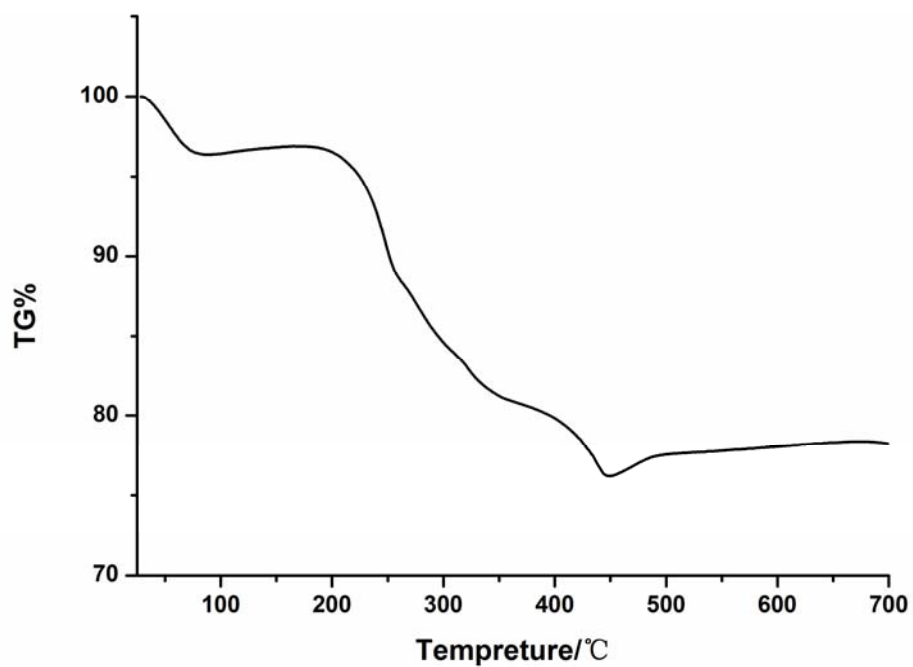

**Fig. S9** TGA of **1**

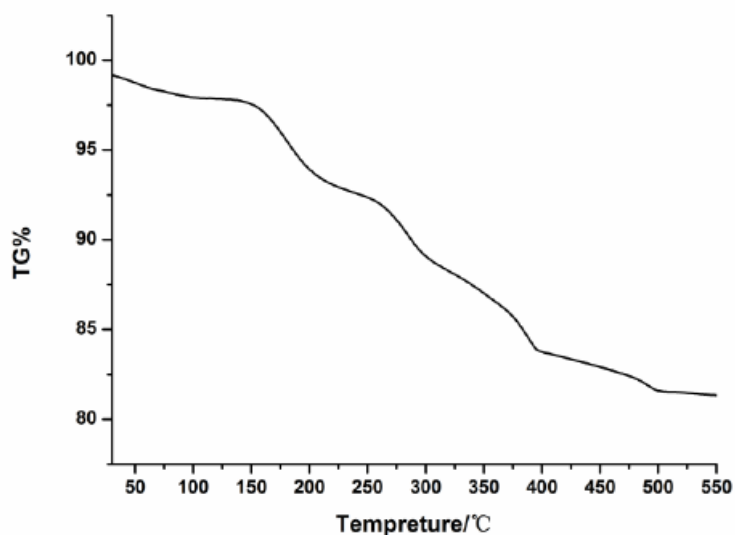

**Fig. S10** TGA of **2**

**Table S1** Bond valance sum analyses for **1**

| Atom | Coord | D_aver | Sigm  | Distort(x10-4) | Valence | BVSum(Sigma) |
|------|-------|--------|-------|----------------|---------|--------------|
| Mo1  | 6.00  | 2.0612 | ( 14) | 32.613         | 4.000   | 4.141( 17)   |
| Mo2  | 6.00  | 2.0525 | ( 15) | 26.885         | 4.000   | 4.184( 17)   |
| Mo3  | 6.00  | 2.0485 | ( 15) | 30.298         | 4.000   | 4.239( 17)   |
| Mo4  | 6.00  | 2.0360 | ( 14) | 14.944         | 4.000   | 4.308( 17)   |
| Mo5  | 6.00  | 2.0538 | ( 14) | 30.590         | 4.000   | 4.216( 16)   |
| Mo6  | 6.00  | 2.0503 | ( 15) | 32.132         | 4.000   | 4.256( 18)   |
| Mo7  | 6.00  | 2.0525 | ( 14) | 31.841         | 4.000   | 4.214( 17)   |
| Mo8  | 6.00  | 2.0533 | ( 13) | 30.034         | 4.000   | 4.207( 16)   |
| Mo9  | 6.00  | 2.0480 | ( 14) | 21.987         | 4.000   | 4.210( 16)   |
| Mo10 | 6.00  | 2.0521 | ( 13) | 22.743         | 4.000   | 4.183( 15)   |
| Mo11 | 6.00  | 2.0388 | ( 13) | 23.802         | 4.000   | 4.336( 15)   |
| Mo12 | 6.00  | 2.0500 | ( 12) | 25.881         | 4.000   | 4.232( 15)   |
| Mo13 | 5.00  | 1.9155 | ( 16) | 45.077         | 5.000   | 5.219( 25)   |
| Mo14 | 5.00  | 1.9268 | ( 16) | 39.748         | 5.000   | 5.044( 25)   |
| Mo15 | 5.00  | 1.9159 | ( 16) | 45.514         | 5.000   | 5.221( 26)   |
| Mo16 | 5.00  | 1.9221 | ( 16) | 37.894         | 5.000   | 5.092( 26)   |



|      |      |             |         |        |            |
|------|------|-------------|---------|--------|------------|
| Mo17 | 5.00 | 1.8742( 17) | 76.001  | 6.000  | 5.947( 30) |
| Mo18 | 6.00 | 2.0291( 15) | 276.066 | 6.000  | 5.989( 30) |
| Mo19 | 5.00 | 1.8765( 16) | 70.941  | 6.000  | 5.879( 28) |
| Na   | 6.00 | 2.4887( 15) | 84.380  | 1.000  | 1.104( 5)  |
| O1   | 4.00 | 2.1055( 17) | 25.481  | -2.000 | 2.225( 10) |
| O2   | 2.00 | 1.9269( 25) | 0.681   | -2.000 | 1.792( 12) |
| O3   | 2.00 | 1.9545( 28) | 2.008   | -2.000 | 1.667( 13) |
| O4   | 2.00 | 1.9297( 26) | 0.372   | -2.000 | 1.778( 13) |
| O5   | 4.00 | 2.1273( 17) | 32.714  | -2.000 | 2.125( 10) |
| O6   | 2.00 | 1.9327( 26) | 8.788   | -2.000 | 1.784( 12) |
| O7   | 2.00 | 1.9468( 26) | 5.770   | -2.000 | 1.711( 12) |
| O8   | 2.00 | 1.9243( 26) | 0.786   | -2.000 | 1.805( 13) |
| O9   | 4.00 | 2.1363( 17) | 47.874  | -2.000 | 2.125( 10) |
| O10  | 2.00 | 1.9274( 25) | 0.202   | -2.000 | 1.789( 12) |
| O11  | 2.00 | 1.9304( 26) | 0.580   | -2.000 | 1.775( 12) |
| O12  | 2.00 | 1.9237( 24) | 3.202   | -2.000 | 1.814( 12) |
| O13  | 4.00 | 2.1049( 16) | 27.732  | -2.000 | 2.237( 10) |
| O14  | 2.00 | 1.9210( 23) | 0.451   | -2.000 | 1.821( 11) |
| O15  | 2.00 | 1.9267( 23) | 0.018   | -2.000 | 1.792( 11) |
| O16  | 2.00 | 1.9346( 23) | 0.000   | -2.000 | 1.754( 11) |
| O17  | 1.00 | 1.6863( 39) | 0.000   | -2.000 | 1.816( 19) |
| O18  | 1.00 | 1.6853( 42) | 0.000   | -2.000 | 1.821( 21) |
| O19  | 4.00 | 2.2398( 17) | 219.065 | -2.000 | 2.111( 10) |
| O20  | 3.00 | 2.0241( 20) | 11.841  | -2.000 | 2.193( 12) |
| O21  | 1.00 | 1.6789( 41) | 0.000   | -2.000 | 1.852( 21) |
| O22  | 1.00 | 1.6856( 43) | 0.000   | -2.000 | 1.819( 21) |
| O23  | 4.00 | 2.2472( 18) | 227.161 | -2.000 | 2.098( 11) |
| O24  | 3.00 | 2.0319( 19) | 14.269  | -2.000 | 2.155( 11) |
| O25  | 1.00 | 1.6925( 42) | 0.000   | -2.000 | 1.785( 20) |
| O26  | 2.00 | 1.9176( 27) | 47.989  | -2.000 | 2.070( 16) |

|     |      |             |         |        |            |
|-----|------|-------------|---------|--------|------------|
| O27 | 1.00 | 1.7010( 38) | 0.000   | -2.000 | 1.745( 18) |
| O28 | 2.00 | 1.9105( 26) | 47.126  | -2.000 | 2.107( 16) |
| O29 | 2.00 | 1.9496( 25) | 29.276  | -2.000 | 1.819( 13) |
| O30 | 3.00 | 2.0749( 19) | 11.418  | -2.000 | 1.879( 10) |
| O31 | 3.00 | 2.1574( 19) | 141.940 | -2.000 | 1.839( 11) |
| O32 | 2.00 | 1.9367( 25) | 12.015  | -2.000 | 1.834( 13) |
| O33 | 2.00 | 1.9530( 25) | 0.793   | -2.000 | 1.670( 11) |
| O34 | 3.00 | 2.0570( 19) | 7.417   | -2.000 | 1.957( 10) |
| O35 | 2.00 | 1.9395( 28) | 41.321  | -2.000 | 1.901( 15) |
| O36 | 3.00 | 2.0580( 20) | 31.823  | -2.000 | 2.068( 12) |
| O37 | 3.00 | 2.0526( 19) | 28.466  | -2.000 | 2.084( 11) |
| O38 | 2.00 | 1.9397( 24) | 8.467   | -2.000 | 1.809( 12) |
| O39 | 1.00 | 1.6886( 39) | 0.000   | -2.000 | 1.804( 19) |
| O40 | 1.00 | 1.7022( 41) | 0.000   | -2.000 | 1.739( 19) |
| O41 | 3.00 | 2.0631( 19) | 9.047   | -2.000 | 1.932( 10) |
| O42 | 2.00 | 2.1089( 23) | -0.002  | -2.000 | 1.095( 7)  |
| O43 | 3.00 | 2.1413( 19) | 128.255 | -2.000 | 1.871( 11) |
| O44 | 3.00 | 2.0615( 19) | 3.630   | -2.000 | 1.920( 10) |
| N1  | 1.00 | 2.2212( 36) | 0.000   | -3.000 | 0.618( 6)  |
| N2  | 1.00 | 2.2392( 34) | 0.000   | -3.000 | 0.588( 5)  |
| N3  | 1.00 | 2.2434( 37) | 0.000   | -3.000 | 0.582( 6)  |
| N4  | 1.00 | 2.2018( 35) | 0.000   | -3.000 | 0.651( 6)  |
| N5  | 1.00 | 2.2161( 33) | 0.000   | -3.000 | 0.626( 6)  |
| N6  | 1.00 | 2.2221( 41) | 0.000   | -3.000 | 0.616( 7)  |
| N7  | 1.00 | 2.2407( 36) | 0.000   | -3.000 | 0.586( 6)  |
| N8  | 1.00 | 2.2282( 27) | 0.000   | -3.000 | 0.606( 4)  |
| N9  | 1.00 | 2.2216( 37) | 0.000   | -3.000 | 0.617( 6)  |
| N10 | 1.00 | 2.2111( 27) | 0.000   | -3.000 | 0.635( 5)  |
| N11 | 1.00 | 2.2046( 28) | 0.000   | -3.000 | 0.646( 5)  |
| N12 | 1.00 | 2.1958( 24) | 0.000   | -3.000 | 0.662( 4)  |

**Table S2** Bond valance sum analyses for **2**.

| Atom | Coord | D_aver  | Sigm | Distort(x10-4) | Valence | BVSum(Sigma) |
|------|-------|---------|------|----------------|---------|--------------|
| Zn   | 5.00  | 2.0477( | 24)  | 15.886         | 2.000   | 2.023( 13)   |
| Mo1  | 6.00  | 2.0463( | 23)  | 24.533         | 4.000   | 4.243( 27)   |
| Mo2  | 6.00  | 2.0752( | 24)  | 29.786         | 4.000   | 3.989( 26)   |
| Mo3  | 6.00  | 2.0552( | 23)  | 19.503         | 4.000   | 4.125( 26)   |
| Mo4  | 6.00  | 1.9904( | 22)  | 124.198        | 6.000   | 5.618( 40)   |
| Mo5  | 6.00  | 1.9885( | 22)  | 99.818         | 6.000   | 5.514( 37)   |
| Mo6  | 6.00  | 1.9846( | 24)  | 135.314        | 6.000   | 5.779( 49)   |
| Mo7  | 6.00  | 1.9910( | 23)  | 161.635        | 6.000   | 5.750( 44)   |
| Mo8  | 6.00  | 1.9938( | 23)  | 166.130        | 6.000   | 5.723( 44)   |
| Mo9  | 6.00  | 1.9871( | 22)  | 171.502        | 6.000   | 5.800( 38)   |
| Mo10 | 6.00  | 1.9802( | 22)  | 106.372        | 6.000   | 5.668( 38)   |
| Mo11 | 6.00  | 1.9827( | 24)  | 140.228        | 6.000   | 5.752( 51)   |
| Mo12 | 6.00  | 1.9797( | 22)  | 126.270        | 6.000   | 5.753( 40)   |
| Mo13 | 6.00  | 1.9830( | 23)  | 127.464        | 6.000   | 5.721( 42)   |
| P1   | 4.00  | 1.5481( | 28)  | 1.002          | 5.000   | 4.824( 37)   |
| P2   | 4.00  | 1.5405( | 29)  | 0.510          | 5.000   | 4.921( 39)   |
| P3   | 4.00  | 1.5430( | 30)  | 1.967          | 5.000   | 4.894( 40)   |
| P4   | 4.00  | 1.5501( | 30)  | 1.634          | 5.000   | 4.800( 39)   |
| O1   | 4.00  | 2.0674( | 28)  | 2.942          | -2.000  | 2.185( 16)   |
| O2   | 2.00  | 1.9513( | 35)  | 0.261          | -2.000  | 1.677( 16)   |
| O3   | 2.00  | 1.9230( | 39)  | 0.000          | -2.000  | 1.810( 19)   |
| O4   | 2.00  | 1.9311( | 39)  | 0.212          | -2.000  | 1.771( 19)   |
| O5   | 2.00  | 1.8161( | 42)  | 217.122        | -2.000  | 1.790( 22)   |
| O6   | 2.00  | 1.8218( | 46)  | 216.706        | -2.000  | 1.763( 24)   |
| O7   | 2.00  | 1.7361( | 36)  | 136.211        | -2.000  | 1.783( 19)   |
| O8   | 1.00  | 1.5264( | 52)  | 0.000          | -2.000  | 1.278( 18)   |
| O9   | 3.00  | 1.9641( | 32)  | 195.765        | -2.000  | 1.905( 20)   |

|     |      |             |         |        |            |
|-----|------|-------------|---------|--------|------------|
| O10 | 2.00 | 1.8026( 38) | 201.468 | -2.000 | 1.837( 20) |
| O11 | 2.00 | 1.8159( 34) | 204.686 | -2.000 | 1.813( 18) |
| O12 | 1.00 | 1.5212( 69) | 0.001   | -2.000 | 1.295( 24) |
| O13 | 3.00 | 1.9529( 32) | 190.933 | -2.000 | 1.968( 20) |
| O14 | 2.00 | 1.7852( 38) | 174.590 | -2.000 | 1.895( 20) |
| O15 | 2.00 | 1.8073( 34) | 218.430 | -2.000 | 1.867( 19) |
| O16 | 1.00 | 1.5111( 70) | 0.000   | -2.000 | 1.331( 25) |
| O17 | 2.00 | 2.1116( 33) | 1.580   | -2.000 | 1.124( 10) |
| O18 | 2.00 | 2.1107( 33) | 1.602   | -2.000 | 1.127( 10) |
| O19 | 2.00 | 1.9007( 42) | 3.798   | -2.000 | 2.045( 23) |
| O20 | 2.00 | 1.9222( 40) | 0.248   | -2.000 | 1.920( 21) |
| O21 | 2.00 | 1.9181( 34) | 1.691   | -2.000 | 1.945( 17) |
| O22 | 2.00 | 1.9197( 40) | 1.431   | -2.000 | 1.936( 21) |
| O23 | 2.00 | 1.8940( 32) | 2.097   | -2.000 | 2.077( 18) |
| O24 | 4.00 | 2.2110( 26) | 277.986 | -2.000 | 1.869( 16) |
| O25 | 1.00 | 1.6828( 59) | 0.000   | -2.000 | 1.833( 29) |
| O26 | 2.00 | 1.9225( 34) | 1.438   | -2.000 | 1.922( 17) |
| O27 | 1.00 | 1.6859( 83) | 0.000   | -2.000 | 1.818( 41) |
| O28 | 1.00 | 1.6878( 71) | 0.000   | -2.000 | 1.808( 34) |
| O29 | 2.00 | 2.0776( 36) | 0.005   | -2.000 | 1.261( 12) |
| O30 | 4.00 | 2.2719( 28) | 340.514 | -2.000 | 1.794( 22) |
| O31 | 3.00 | 2.0877( 33) | 353.804 | -2.000 | 1.836( 20) |
| O32 | 1.00 | 1.6783( 64) | 0.000   | -2.000 | 1.856( 32) |
| O33 | 2.00 | 1.9146( 42) | 0.243   | -2.000 | 1.960( 22) |
| O34 | 1.00 | 1.6932( 49) | 0.000   | -2.000 | 1.782( 24) |
| O35 | 2.00 | 1.9151( 41) | 13.039  | -2.000 | 1.991( 22) |
| O36 | 2.00 | 1.9110( 39) | 0.000   | -2.000 | 1.978( 21) |
| O37 | 2.00 | 1.8987( 32) | 3.391   | -2.000 | 2.054( 18) |
| O38 | 2.00 | 1.9032( 32) | 7.515   | -2.000 | 2.041( 18) |
| O39 | 1.00 | 1.6775( 55) | 0.000   | -2.000 | 1.859( 28) |

|     |      |             |         |        |            |
|-----|------|-------------|---------|--------|------------|
| O40 | 1.00 | 1.6950( 71) | 0.000   | -2.000 | 1.773( 34) |
| O41 | 1.00 | 1.6813( 89) | 0.000   | -2.000 | 1.840( 44) |
| O42 | 3.00 | 2.0843( 33) | 341.660 | -2.000 | 1.826( 20) |
| O43 | 2.00 | 1.9091( 44) | 0.288   | -2.000 | 1.989( 24) |
| O44 | 2.00 | 1.9074( 41) | 1.516   | -2.000 | 2.002( 22) |
| O45 | 2.00 | 1.8965( 42) | 1.348   | -2.000 | 2.061( 23) |
| O46 | 3.00 | 1.9967( 30) | 0.091   | -2.000 | 2.028( 17) |
| O47 | 1.00 | 1.6903( 64) | 0.000   | -2.000 | 1.796( 31) |
| O48 | 2.00 | 1.9127( 33) | 16.939  | -2.000 | 2.014( 18) |
| O49 | 1.00 | 1.6676( 55) | 0.000   | -2.000 | 1.910( 28) |
| N1  | 1.00 | 2.2254( 68) | 0.000   | -3.000 | 0.611( 11) |
| N2  | 1.00 | 2.2207( 91) | 0.000   | -3.000 | 0.619( 15) |
| N3  | 1.00 | 2.2173( 67) | 0.000   | -3.000 | 0.624( 11) |
